# Supplementary material
Source: Frontiers journal article supplement (https://www.frontiersin.org/articles/535301)
Supplement: Table_1.DOCX [file Table_1.DOCX]

Supplementary Material

Supplementary Table 1: Overview of the topics selected by the literature review and expert opinion process.

Supplementary Table 2: Results of the topic selection process, each author was given 9 votes and we considered topics with 3 or more votes (highlighted in blue).
